# Supplementary figures and images for: Porphyra polysaccharide-derived carbon dots for non-viral co-delivery of different gene combinations and neuronal differentiation of ectodermal mesenchymal stem cells
Source: Royal Society of Chemistry journal article supplement (doi:10.1039/c7nr03327c), 2017-01-01

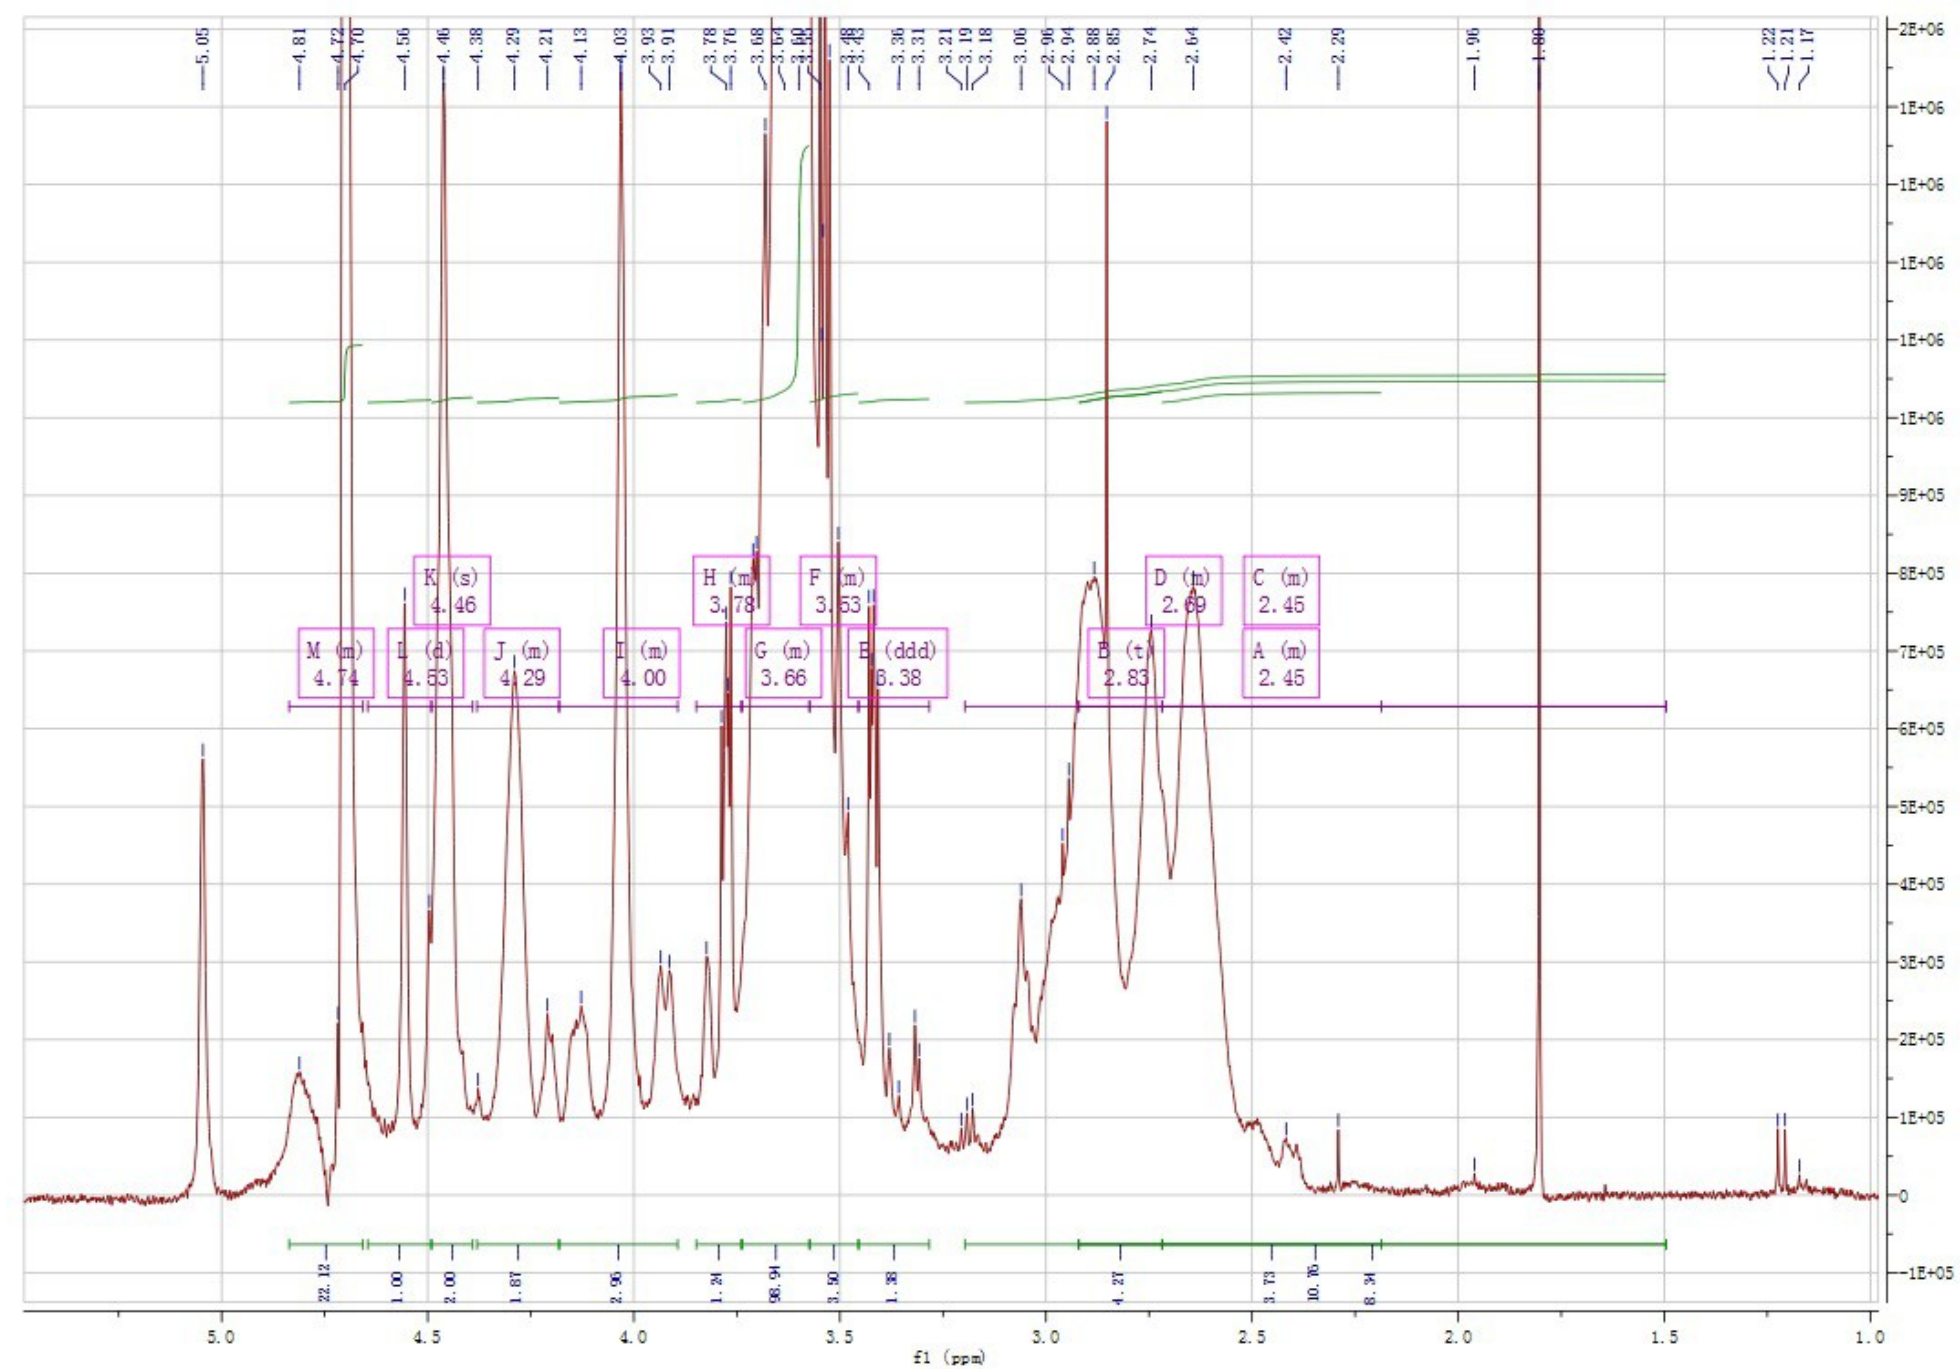

Supplement: c7nr03327c2.pdf [file c7nr03327c2.pdf]
